# Supplementary material for: Temperature-dependent Raman study and determination of anisotropy ratio and in-plane thermal conductivity of low-temperature CVD-grown PdSe2 using unpolarized laser excitation
Source: Royal Society of Chemistry journal article supplement (doi:10.1039/d1tc03248h), 2021-01-01
Supplement: d1tc03248h1.pdf [file d1tc03248h1.pdf]

## Supporting Information

### Temperature-dependent Raman study and determination of anisotropy ratio and in-plane thermal conductivity of low-temperature CVD grown PdSe<sub>2</sub> using unpolarized laser excitation

**Tadasha Jena<sup>1</sup>, Md Tarik Hossain<sup>2</sup>, and P. K. Giri<sup>1, 2\*</sup>**

<sup>1</sup>*Centre for Nanotechnology, Indian Institute of Technology Guwahati, Guwahati - 781039, India*

<sup>2</sup>*Department of Physics, Indian Institute of Technology Guwahati, Guwahati - 781039, India*

---

\* Corresponding author, email [giri@iitg.ac.in](mailto:giri@iitg.ac.in) (PKG)

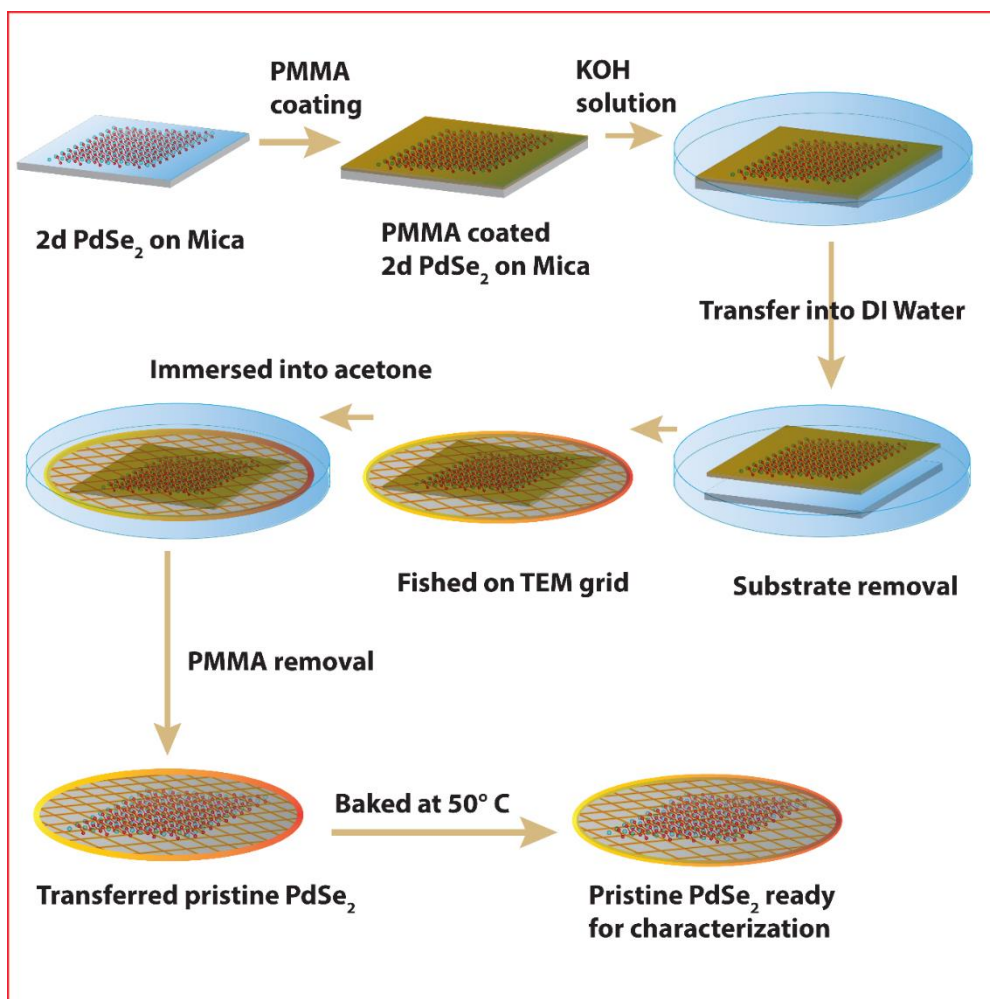

**Fig. S1:** Schematic of the transfer process of 2D PdSe<sub>2</sub> flakes from mica substrate to the target substrate.

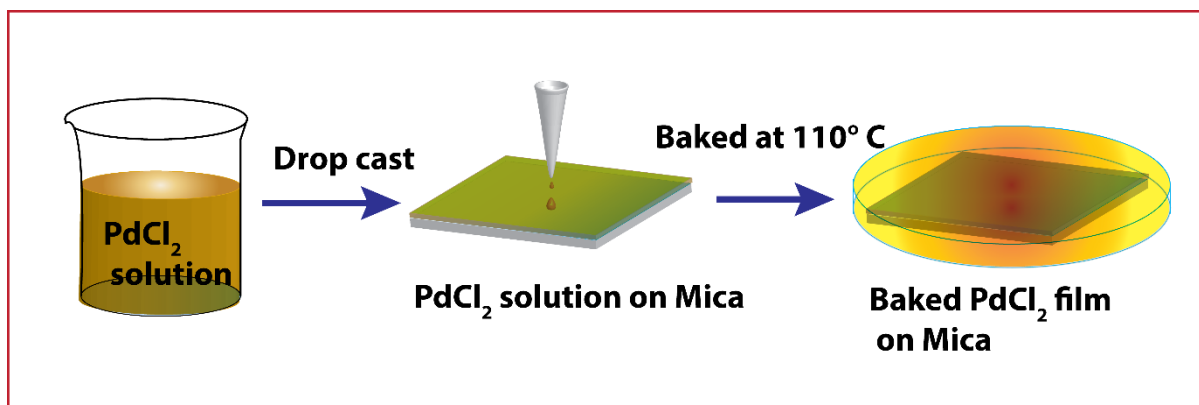

**Fig. S2:** Schematic representation of substrate preparation used for the growth of 2D PdSe<sub>2</sub> flakes.

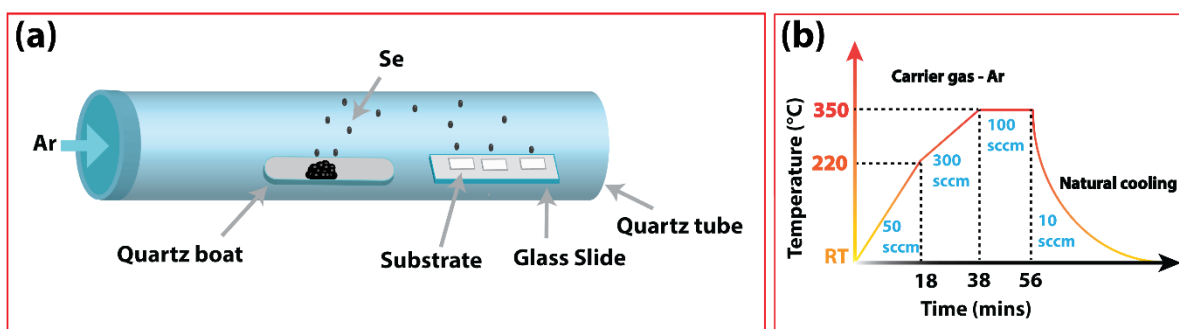

**Fig. S3:** (a) Schematic representation of the CVD setup used to grow 2D PdSe<sub>2</sub> flakes. (b) Temperature profile and growth parameters of CVD grown 2D PdSe<sub>2</sub>.

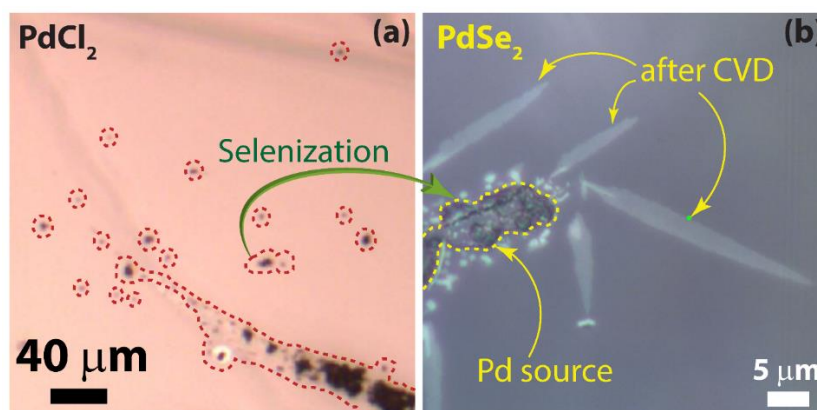

**Fig. S4:** (a) Inhomogeneous distribution of PdCl<sub>2</sub> solution on mica substrate after evaporation, which acts as a Pd source in the CVD process. (b) During the CVD, it follows a selenization process where ribbon-like and sheet-like PdSe<sub>2</sub> were formed after dragging Pd from Pd source.

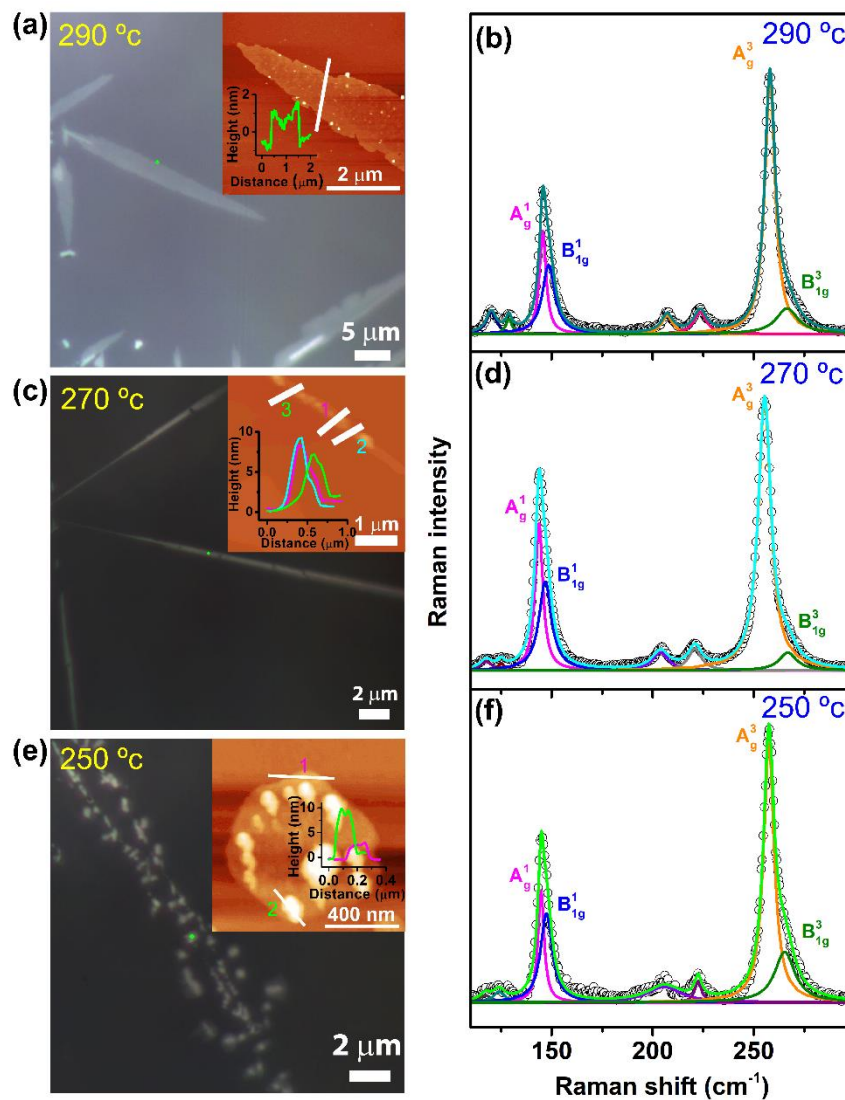

**Fig. S5:** Optical images of (a, c, e) layered PdSe<sub>2</sub> grown with substrate temperatures 290°C, 270°C, 250°C, respectively. The inset shows the corresponding AFM images with height profiles. (b, d, f) Corresponding Raman spectra of the samples (on mica substrate) for different growth temperatures.

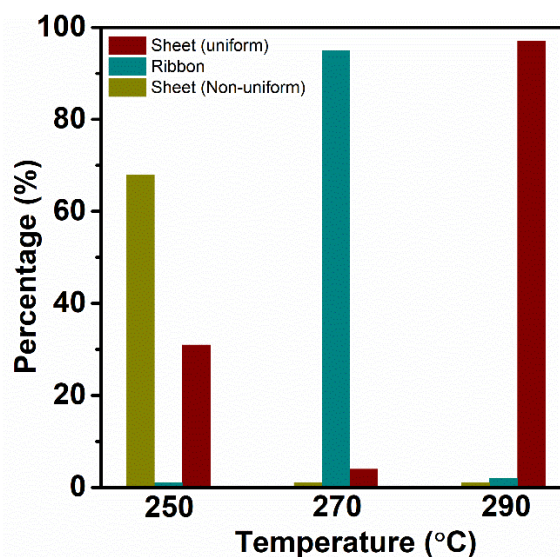

**Fig. S6:** Distribution percentage for three types of PdSe<sub>2</sub> (uniform sheet-like, ribbon-like, non-uniform sheet-like) structures observed at different growth temperatures 250°C, 270°C, 290°C.

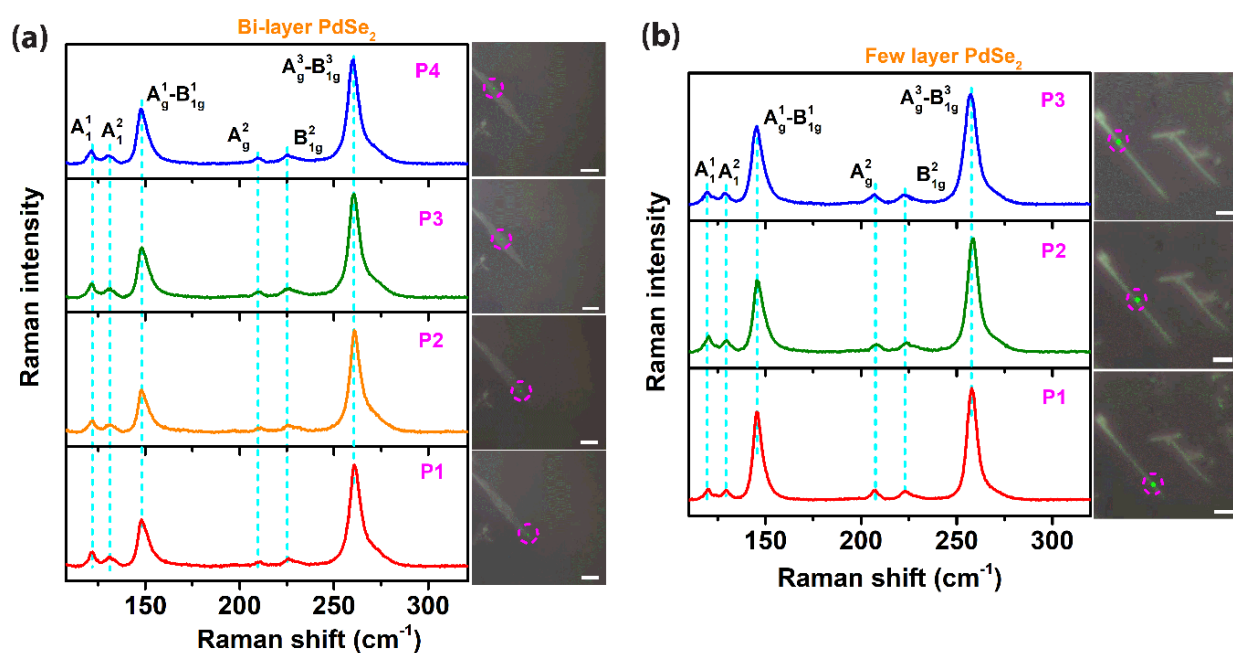

**Fig. S7:** Stacked Raman spectra at different locations on (a) bilayer PdSe<sub>2</sub> (b) few-layer PdSe<sub>2</sub> showing high uniformity of the layers. In the optical images, the scale bar is 5 μm for (a) and 2 μm for (b).



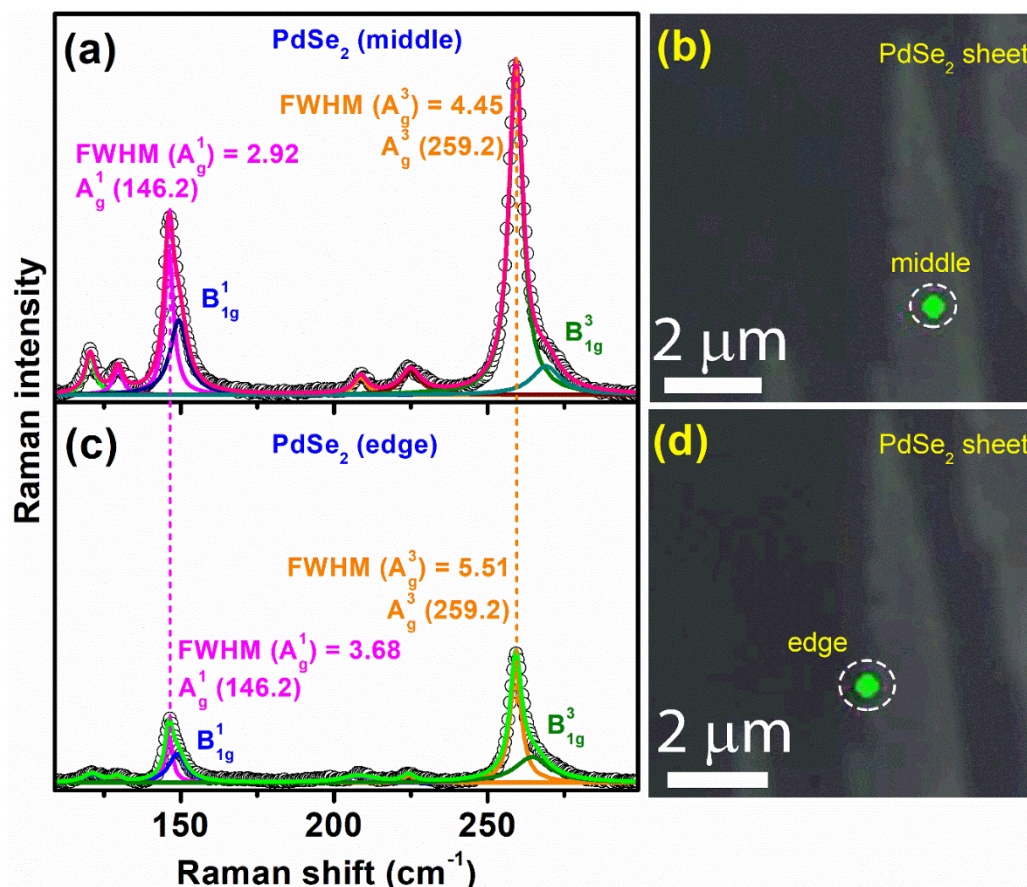

**Fig. S8:** (a) Raman spectra of the demarcated spot (middle) of PdSe<sub>2</sub> sheet, (b) the corresponding optical image. (c) Raman spectra of the demarcated spot (edge) of PdSe<sub>2</sub> sheet, (d) the corresponding optical image. Raman intensity for both the panels is same.

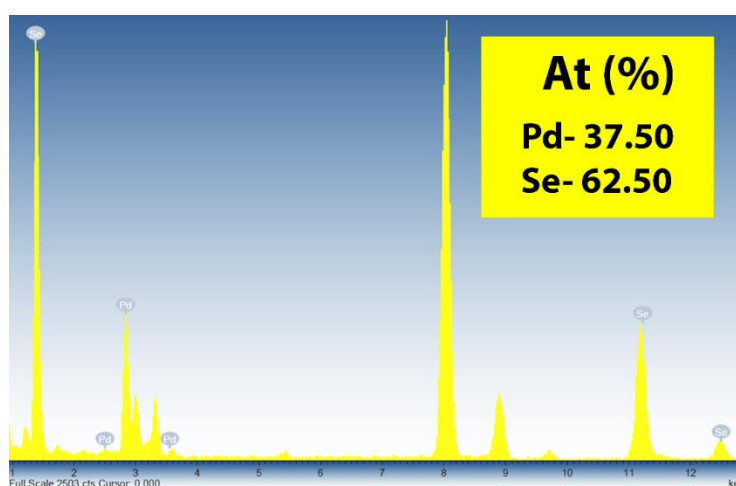

**Fig. S9:** EDX spectrum for CVD grown PdSe<sub>2</sub>.

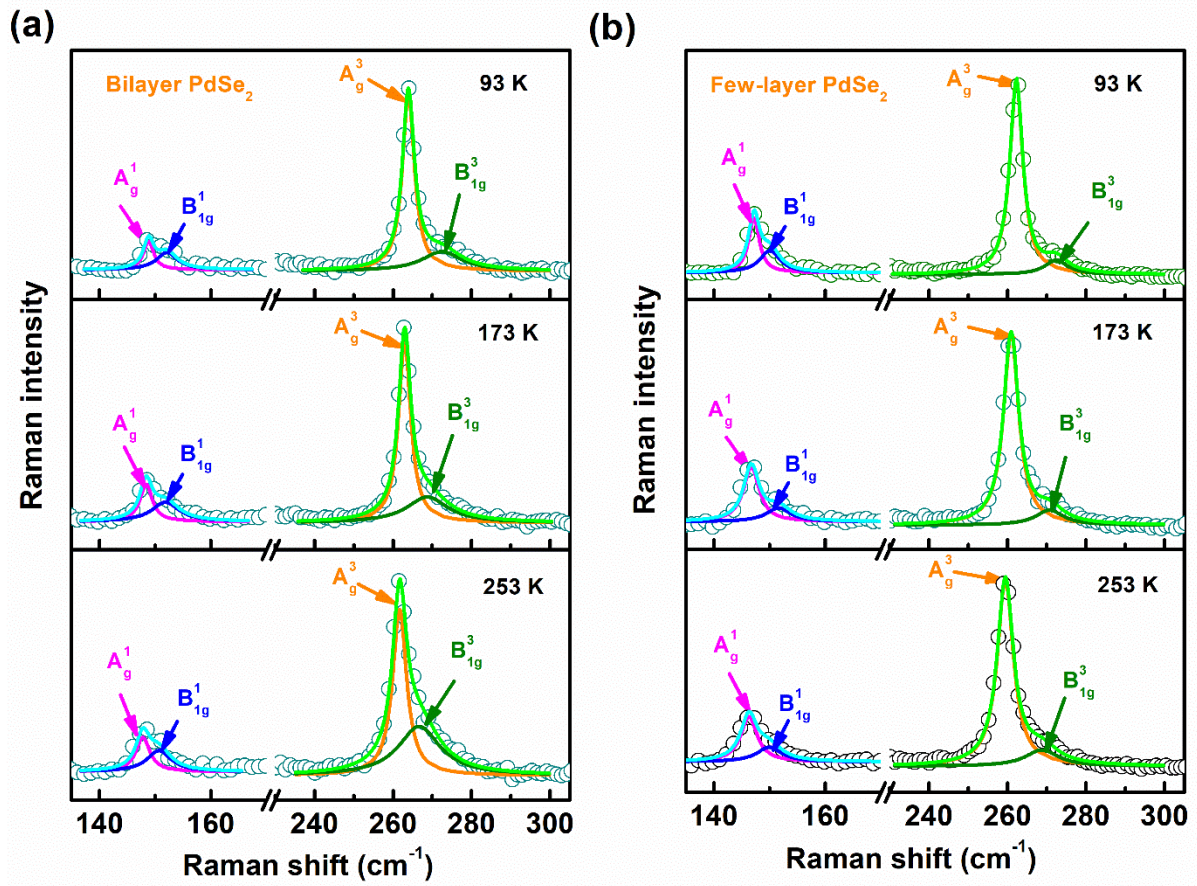

**Fig. S10:** Fitted low-temperature Raman spectra for (a) bi-layer and (b) few layer PdSe<sub>2</sub> for temperatures 93 K, 173 K, 253 K.



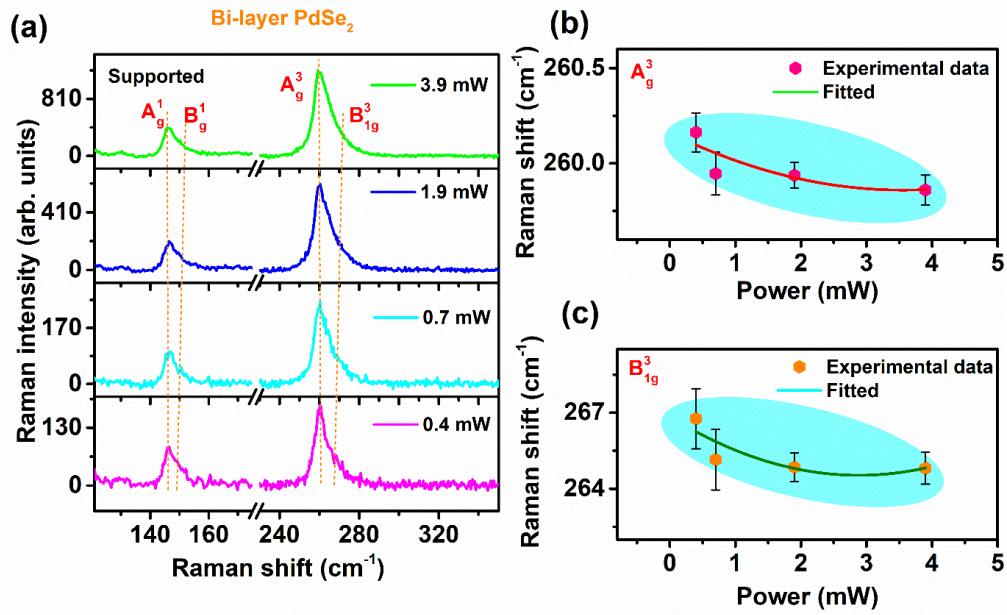

**Fig. S11:** (a) Power-dependent Raman spectra for bi-layer PdSe<sub>2</sub> in supported mode. (b,c) The corresponding Raman shift vs. power plot for A<sub>g</sub><sup>3</sup>, and B<sub>1g</sub><sup>3</sup> Raman modes, respectively. The symbols represent the experimental data, and the solid line refers to the fitted data using equation S1.

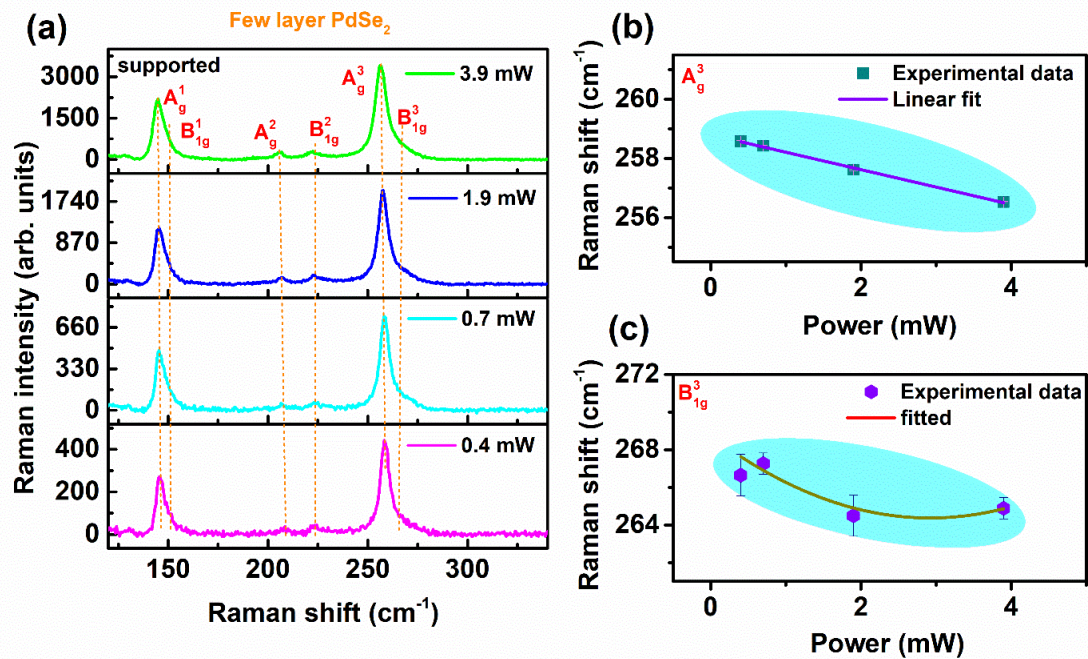

**Fig. S12:** (a) Power-dependent Raman spectra for few-layer PdSe<sub>2</sub> in supported mode. (b,c) The corresponding Raman shift vs. power for A<sub>g</sub><sup>3</sup>, and B<sub>1g</sub><sup>3</sup> Raman modes, respectively. The symbols represent the experimental data, and the solid line refers to the fitted data using equation S1.



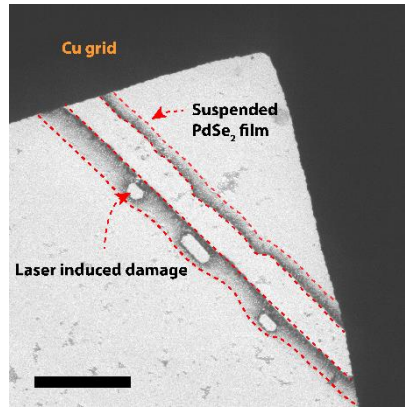

**Fig. S13:** Low-resolution TEM image of suspended flakes on Cu grid. The scale bar is 10  $\mu\text{m}$ .

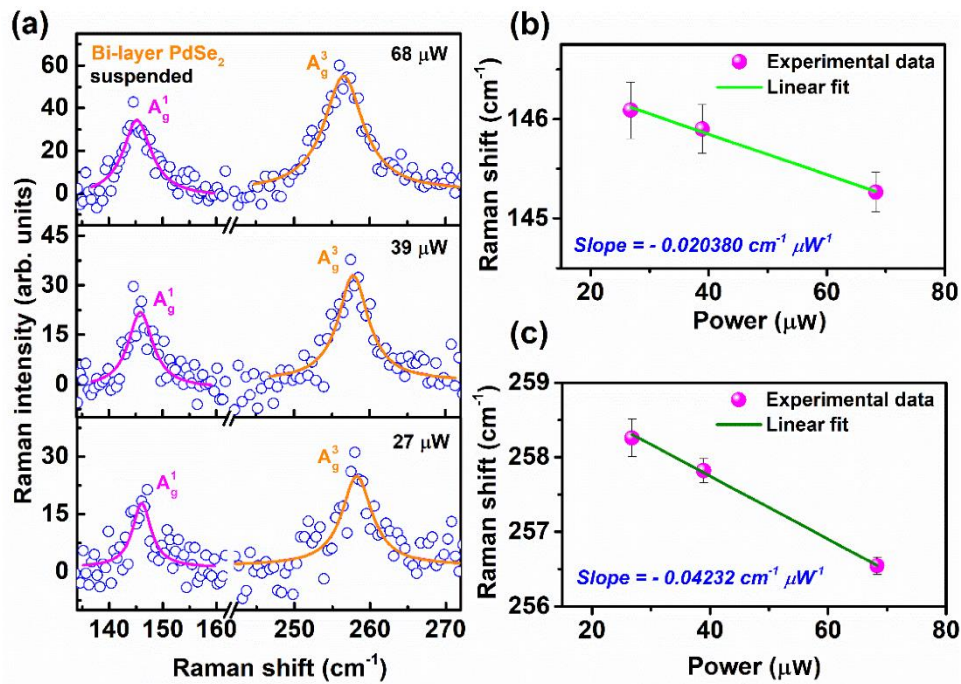

**Fig. S14:** (a) Laser power-dependent Raman spectra of suspended bi-layer PdSe<sub>2</sub>. Corresponding Raman shift for (b)  $A_g^1$  and (c)  $A_g^3$  modes with laser power. Solid line indicates the linear fit.

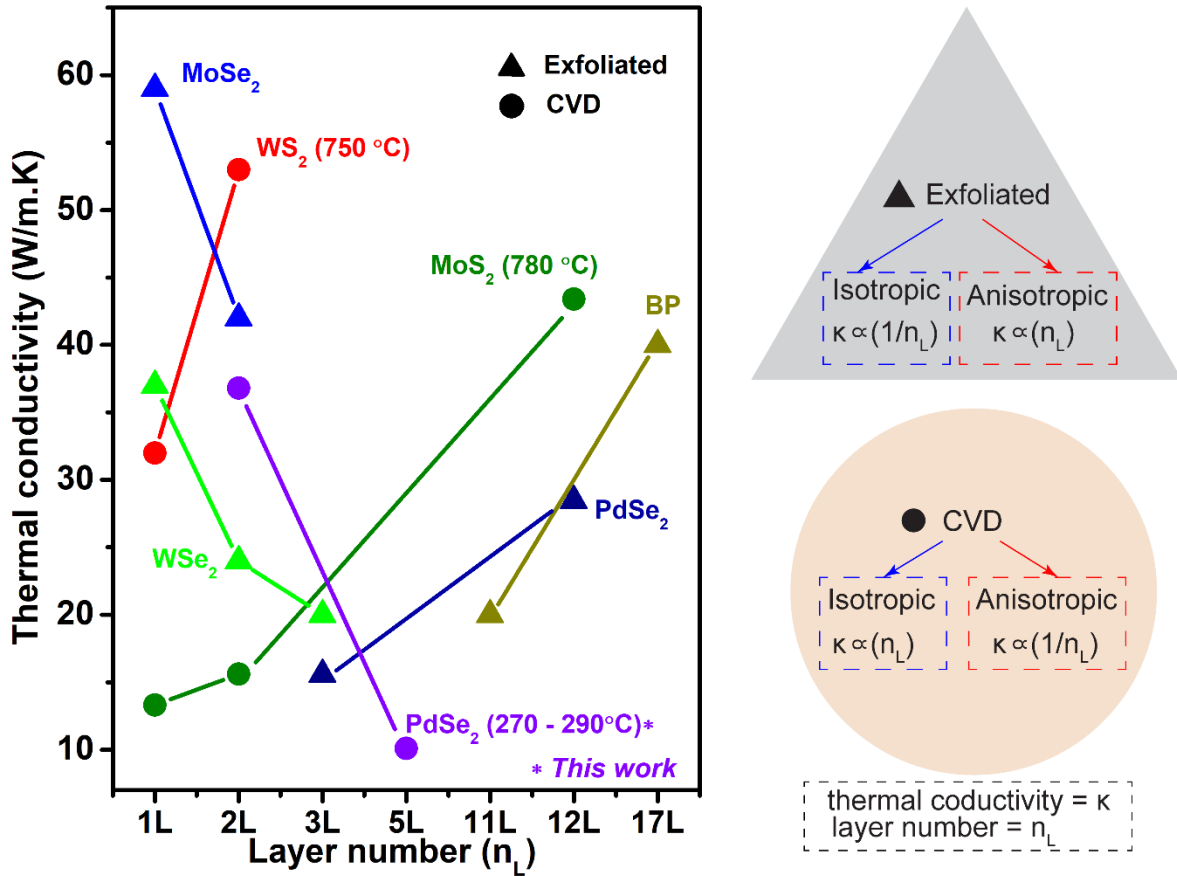

**Fig. S15:** Comparison of thermal conductivity of PdSe<sub>2</sub> with other conventional 2D materials for different layer numbers.[1-6]The schematic illustrations on the right side reflects the thermal conductivity relationship with layer number for CVD grown and exfoliated isotropic and anisotropic 2D materials.

Table S1: Relative spectral shifts of different Raman modes of CVD-grown bi-layer and few-layer PdSe<sub>2</sub>.

| Modes                        | Raman shift                                   |                                                 | Spectral downshift (cm <sup>-1</sup> ) |
|------------------------------|-----------------------------------------------|-------------------------------------------------|----------------------------------------|
|                              | Bilayer PdSe <sub>2</sub> (cm <sup>-1</sup> ) | Few layer PdSe <sub>2</sub> (cm <sup>-1</sup> ) |                                        |
| A <sup>1</sup> <sub>1</sub>  | 120.8                                         | 119.9                                           | 0.9                                    |
| A <sup>2</sup> <sub>1</sub>  | 129.8                                         | 128.0                                           | 1.8                                    |
| A <sup>1</sup> <sub>g</sub>  | 146.1                                         | 144.6                                           | 1.5                                    |
| B <sup>1</sup> <sub>1g</sub> | 150.5                                         | 147.5                                           | 3                                      |
| A <sup>2</sup> <sub>g</sub>  | 207.9                                         | 205.6                                           | 2.3                                    |
| B <sup>2</sup> <sub>1g</sub> | 224.2                                         | 222.5                                           | 1.7                                    |
| A <sup>3</sup> <sub>g</sub>  | 259.3                                         | 257.1                                           | 2                                      |
| B <sup>3</sup> <sub>1g</sub> | 268.2                                         | 268.5                                           | -0.3                                   |

Table S2: Relative change in linewidths with change in layer number for different Raman modes of CVD grown PdSe<sub>2</sub>.

| Modes                        | FWHM                                          |                                                 | Relative change in FWHM for few layer PdSe <sub>2</sub> |
|------------------------------|-----------------------------------------------|-------------------------------------------------|---------------------------------------------------------|
|                              | Bilayer PdSe <sub>2</sub> (cm <sup>-1</sup> ) | Few layer PdSe <sub>2</sub> (cm <sup>-1</sup> ) |                                                         |
| A <sup>1</sup> <sub>1</sub>  | 5.43                                          | 7.74                                            | increase                                                |
| A <sup>2</sup> <sub>1</sub>  | 3.87                                          | 2.60                                            | decrease                                                |
| A <sup>1</sup> <sub>g</sub>  | 4.15                                          | 4.08                                            | decrease                                                |
| B <sup>1</sup> <sub>1g</sub> | 5.43                                          | 7.16                                            | increase                                                |
| A <sup>2</sup> <sub>g</sub>  | 10.40                                         | 7.82                                            | decrease                                                |
| B <sup>2</sup> <sub>1g</sub> | 4.75                                          | 7.22                                            | increase                                                |
| A <sup>3</sup> <sub>g</sub>  | 5.15                                          | 7.24                                            | increase                                                |
| B <sup>3</sup> <sub>1g</sub> | 10.55                                         | 10.39                                           | decrease                                                |

Table S3: Comparison of Raman peak position, FWHM of  $A_g^1$  and  $A_g^3$  mode in PdSe<sub>2</sub> at different growth temperatures.

| Growth temperature | $A_g^1$ (cm <sup>-1</sup> ) | FWHM (cm <sup>-1</sup> ) | $A_g^3$ (cm <sup>-1</sup> ) | FWHM (cm <sup>-1</sup> ) |
|--------------------|-----------------------------|--------------------------|-----------------------------|--------------------------|
| 290 °C             | 145.6                       | 3.99                     | 258.1                       | 6.2                      |
| 270 °C             | 143.8                       | 4.56                     | 255.4                       | 7.7                      |
| 250 °C             | 144.8                       | 3.8                      | 257.5                       | 6.3                      |

Table S4: Fitting parameters of Raman spectra in figure 4 and 5.

| Temperature (°C) | Bi-layer PdSe <sub>2</sub> (Raman shift) |                |                                     |                | Few-layer PdSe <sub>2</sub> (Raman shift) |                |                                     |                |
|------------------|------------------------------------------|----------------|-------------------------------------|----------------|-------------------------------------------|----------------|-------------------------------------|----------------|
|                  | $A_g^1$ mode (cm <sup>-1</sup> )         | standard error | $B_{1g}^1$ mode (cm <sup>-1</sup> ) | standard error | $A_g^3$ mode (cm <sup>-1</sup> )          | standard error | $B_{1g}^3$ mode (cm <sup>-1</sup> ) | standard error |
| 93               | 147.19                                   | 0.09           | 150.22                              | 0.74           | 262.26                                    | 0.02           | 272.52                              | 0.45           |
| 113              | 147.39                                   | 0.10           | 151.28                              | 0.72           | 262.15                                    | 0.03           | 272.82                              | 0.39           |
| 133              | 146.82                                   | 0.11           | 149.84                              | 0.85           | 261.67                                    | 0.02           | 271.66                              | 0.39           |
| 153              | 146.74                                   | 0.11           | 149.53                              | 0.75           | 261.50                                    | 0.02           | 270.35                              | 0.60           |
| 173              | 146.64                                   | 0.09           | 152.18                              | 0.82           | 260.91                                    | 0.03           | 270.84                              | 0.48           |
| 193              | 146.95                                   | 0.12           | 150.84                              | 1.02           | 260.91                                    | 0.02           | 269.24                              | 0.46           |
| 213              | 146.82                                   | 0.10           | 150.77                              | 1.33           | 260.50                                    | 0.02           | 270.63                              | 0.40           |
| 223              | 146.72                                   | 0.11           | 150.70                              | 1.17           | 260.53                                    | 0.02           | 270.67                              | 0.55           |
| 243              | 146.16                                   | 0.09           | 149.26                              | 0.75           | 259.84                                    | 0.03           | 268.84                              | 1.00           |
| 263              | 145.86                                   | 0.29           | 148.93                              | 1.01           | 259.16                                    | 0.03           | 268.73                              | 0.68           |

### Excitation Power dependent Raman study (supported PdSe<sub>2</sub> flakes):

Power-dependent micro-Raman measurement was carried out to understand the localized heating effect on Raman modes of CVD grown PdSe<sub>2</sub>. **Fig. S13(a)** shows the stacked Raman spectra of a bilayer PdSe<sub>2</sub> film in a particular position. Here Raman measurement is carried out



on pristine PdSe<sub>2</sub> film grown on mica substrate (supported state). An apparent spectral redshift in Raman modes is discerned whenever excitation power increases. We varied the effective power from 0.4 mW to 3.9 mW by varying ND filters equipped with the instrument. Note that, even in higher power than the power used in suspended condition, we did not observe the sample damage. To better understand the origin of spectral shift, we further fitted all spectrum with Lorentzian lineshape. The spectral shift is observed due to the anharmonicity in the system generated due to localized heating. **Fig. S13(b,c)** shows the corresponding extracted Raman shift vs. Power plot for A<sup>3</sup><sub>g</sub>, B<sup>3</sup><sub>1g</sub> mode, respectively. We observed a non-linear spectral redshift for both modes in the bilayer. The non-linear variation may be due to the quicker heat dissipation to the supported substrate. The non-linear behavior has been fitted with the equation

$$w(P) = w_0 + \beta P + \gamma P^2, \quad (\text{S1})$$

where  $\beta$  and  $\gamma$  are constants. The second and third term corresponds to power generated localized heating effect and thermal expansion effect. For bilayer  $\beta$  and  $\gamma$  are -0.16 and 0.023 in A<sup>3</sup><sub>g</sub> mode -1.61 and 0.28 in B<sup>3</sup><sub>1g</sub> mode. Similarly, Raman spectra for few-layer are recorded in different laser powers. **Fig. S14(a)** shows stacked Raman spectra of few-layer PdSe<sub>2</sub> within the power of 0.4 mW to 3.9 mW. **Fig. S14(b, c)** shows the corresponding spectral shift in A<sup>3</sup><sub>g</sub>, B<sup>3</sup><sub>1g</sub> with power variation for few-layer PdSe<sub>2</sub>. Unlike bilayer PdSe<sub>2</sub>, in few-layer PdSe<sub>2</sub>, a linear shift in A<sup>3</sup><sub>g</sub> but non-linear B<sup>3</sup><sub>1g</sub> mode was observed. A<sup>3</sup><sub>g</sub> mode gives a linear slope value -0.5 cm<sup>-1</sup>mW<sup>-1</sup>. The obtained  $\beta$  and  $\gamma$  values are -2.99 and 0.51 in B<sup>3</sup><sub>1g</sub> mode for few-layer PdSe<sub>2</sub>. To avoid the substrate effect and related error in calculation, we transferred the sample on a Cu grid to measure the purely power dependent effect on PdSe<sub>2</sub>.

## References:

1. Luo, Z., et al., *Anisotropic in-plane thermal conductivity observed in few-layer black phosphorus*. Nature Communications, 2015. **6**(1): p. 8572.

2. Zhang, X., et al., *Measurement of Lateral and Interfacial Thermal Conductivity of Single- and Bilayer MoS<sub>2</sub> and MoSe<sub>2</sub> Using Refined Optothermal Raman Technique*. ACS Applied Materials & Interfaces, 2015. **7**(46): p. 25923-25929.
3. Easy, E., et al., *Experimental and Computational Investigation of Layer-Dependent Thermal Conductivities and Interfacial Thermal Conductance of One- to Three-Layer WSe<sub>2</sub>*. ACS Applied Materials & Interfaces, 2021. **13**(11): p. 13063-13071.
4. Peimyoo, N., et al., *Thermal conductivity determination of suspended mono- and bilayer WS<sub>2</sub> by Raman spectroscopy*. Nano Research, 2015. **8**(4): p. 1210-1221.
5. Chen, L., et al., *In-Plane Anisotropic Thermal Conductivity of Low-Symmetry PdSe<sub>2</sub>*. Sustainability, 2021. **13**(8).
6. Bae, J.J., et al., *Thickness-dependent in-plane thermal conductivity of suspended MoS<sub>2</sub> grown by chemical vapor deposition*. Nanoscale, 2017. **9**(7): p. 2541-2547.
